1 **Title**

2 Cubam receptor-mediated endocytosis in hindgut-derived pseudoplacenta of a  
3 viviparous teleost *Xenotoca eiseni*

4

5 **Running title**

6 Endocytosis in pseudoplacenta of teleost

7

8 **Authors**

9 Atsuo Iida<sup>1, \*</sup>, Kaori Sano<sup>2</sup>, Mayu Inokuchi<sup>3</sup>, Jumpei Nomura<sup>1</sup>, Takayuki Suzuki<sup>1</sup>, Mao  
10 Kuriki<sup>4</sup>, Maina Sogabe<sup>4</sup>, Daichi Susaki<sup>5</sup>, Kaoru Tonosaki<sup>5</sup>, Tetsu Kinoshita<sup>5</sup>, Eiichi  
11 Hondo<sup>1</sup>

12

13 **Affiliations**

14 1. Department of Animal Sciences, Graduate School of Bioagricultural Sciences,  
15 Nagoya University, Tokai National Higher Education and Research System, Nagoya,  
16 Aichi, Japan.

17 2. Department of Chemistry, Faculty of Science, Josai University, Sakado, Saitama,  
18 Japan.

19 3. Department of Life Sciences, Toyo University, Itakura, Gunma, Japan.

20 4. Department of Regeneration Science and Engineering, Institute for Frontier Life and  
21 Medical Sciences, Kyoto University, Kyoto, Kyoto, Japan.

22 5. Kihara Institute for Biological Research, Yokohama City University, Yokohama,  
23 Kanagawa, Japan.

24

25 **Correspondence:** Atsuo Iida

26 **E-mail:** [tol2.4682@gmail.com](mailto:tol2.4682@gmail.com)

27

28 **Keywords**

29 endocytosis, Goodeidae, proteolysis, pseudoplacenta, teleost, viviparity

30

31 **Summary statement**

32 Here, we report that an endocytic pathway is a candidate for nutrient absorption in  
33 pseudoplacenta of a viviparous teleost. The trait may have developed from common  
34 intestinal mechanism among vertebrates.

35 **Abstract**

36 Nutrient transfer from mother to the embryo is essential for reproduction in viviparous  
37 animals. In the viviparous teleost *Xenotoca eiseni* belonging to the family Goodeidae,  
38 the intraovarian embryo intakes the maternal component secreted into the ovarian fluid  
39 via the trophotaenia. Our previous study reported that the epithelial layer cells of the  
40 trophotaenia incorporate a maternal protein via vesicle trafficking. However, the  
41 molecules responsible for the absorption were still elusive. Here, we focused on Cubam  
42 (Cubilin-Amnionless) as a receptor involved in the absorption, and cathepsin L as a  
43 functional protease in the vesicles. Our results indicated that the Cubam receptor is  
44 distributed in the apical surface of the trophotaenia epithelium and then is taken into the  
45 intracellular vesicles. The trophotaenia possesses acidic organelles in epithelial layer  
46 cells and cathepsin L-dependent proteolysis activity. This evidence does not conflict with  
47 our hypothesis that receptor-mediated endocytosis and proteolysis play roles in  
48 maternal macromolecule absorption via the trophotaenia in viviparous teleosts. Such  
49 nutrient absorption involving endocytosis is not a specific trait in viviparous fish. Similar  
50 processes have been reported in the larval stage of oviparous fish or the suckling stage  
51 of viviparous mammals. Our findings suggest that the viviparous teleost acquired  
52 trophotaenia-based viviparity from a modification of the intestinal absorption system  
53 common in vertebrates. This is a fundamental study to understand the strategic variation  
54 of the reproductive system in vertebrates.

55

## 56 **Introduction**

57 August Krogh wrote, "*For such a large number of problems there will be some animal*  
58 *of choice or a few such animals on which it can be most conveniently studied*" [1]. This  
59 study aimed to investigate the molecular mechanism of maternal nutrient absorption in a  
60 species-specific pseudoplacenta of a viviparous teleost species belonging to the family  
61 Goodeidae.

62 Viviparity is a reproduction system, whereby the oocyte is fertilized in the female body,  
63 and subsequent embryo growth occurs with maternal component supply. Each  
64 viviparous animal has acquired processes specialized to the gestation in both the  
65 mother and embryo [2]. The placenta and umbilical cords in viviparous mammals are  
66 major components of the process for mother-to-embryo material transport [3,4]. Other  
67 viviparous components such as the extended yolk sac or pseudoplacenta are known in  
68 several viviparous vertebrates, except mammals [5].

69 The family Goodeidae is a freshwater small teleost distributed in Mexico, which  
70 includes approximately 40 viviparous species [6]. They possess trophotaenia, which is a  
71 hindgut-derived pseudoplacenta that absorbs the maternal component [7,8].  
72 Trophotaenia is a ribbon-like structure consisting of a single epithelial layer, internal  
73 blood vessels, and connective tissues [9,10]. The epithelial cell is like an enterocyte in  
74 the intestine. Electron microscopy indicated that microvilli form in the apical side of the  
75 cell and intracellular vesicles in the cytoplasm [11]. Since the 1980s, these structures  
76 have been believed to be involved in maternal component absorption [12]. The nature of  
77 the maternal component was predicted to be proteins or other macromolecules secreted  
78 into the serum or ovarian fluids; however, no one has experimentally determined its  
79 distinct component [13,14]. Recently, we demonstrated that a yolk protein vitellogenin is

80 secreted into the ovarian lumen of pregnant females, and the intraovarian embryo  
81 absorbs the nutrient protein via the trophotaenia using a goodeid species *Xenotoca*  
82 *eiseni* [15]. In that study, enterocyte-like microvilli and intracellular vesicles were also  
83 observed in the epithelial cells of the trophotaenia. We hypothesized that the epithelial  
84 layer cell in the trophotaenia absorbs the maternal protein and/or other components as  
85 macromolecules because the ovarian lumen lacks proteolysis activity like the digestive  
86 intestine. However, the molecules responsible for the trophotaenia-mediated  
87 macromolecule absorption have not been reported.

88 Vacuolated enterocytes involved in macromolecule absorption have also been reported  
89 in other vertebrate species, including suckling mammals and stomachless fish [16-18].  
90 Park et al. [19] reported that the scavenger receptor complex Cubam (Cubilin-  
91 Amnionless) and Dab2 are required for macromolecule uptake in zebrafish juveniles.  
92 Furthermore, the conditional knockout of *Dab2* in mice led to stunted growth and severe  
93 protein malnutrition at the suckling stage [19]. Based on this report, we discuss the  
94 commonality of molecular process for the macromolecule absorption between the  
95 intestinal enterocytes and the trophotaenia [15]. However, the molecules responsible for  
96 macromolecule absorption in the trophotaenia are still elusive.

97 Here, we report candidate molecules for nutrient uptake and subsequent proteolysis in  
98 the trophotaenia of *X. eiseni*. An RNA-Seq for trophotaenia indicated candidate receptor  
99 molecules and endocytosis-associated proteases expressed in the trophotaenia.  
100 Immunohistochemistry and biochemical assays suggested the presence and functions  
101 of the candidate factors in the trophotaenia.

102 **Methods**

103 *Animal experiments*

104 This study was approved by the ethics review board for animal experiments at Nagoya  
105 University (Approval number: AGR2020028). We sacrificed live animals in minimal  
106 numbers under anesthesia according to the institutional guidelines.

107

108 *Fish breeding*

109 *X. eiseni* was purchased from Meito Suien Co., Ltd. (Nagoya, Japan). Adult fish were  
110 maintained in freshwater at 27 °C under a 14:10-h light: dark photoperiod cycle. Fish  
111 were bred in a mass-mating design, and approximately 30 adult fish were maintained for  
112 this study. The juveniles were fed live brine shrimp larvae, and the adults were fed Hikari  
113 Crest Micro Pellets and ultraviolet-sterilized frozen chironomid larvae (Kyorin Co., Ltd.,  
114 Himeji, Japan). To accurately track the pregnancy period, the laboratory-born fish were  
115 crossed in a pair-mating design, and the mating behavior was recorded.

116

117 *Sample collection*

118 Fish samples were anesthetized using tricaine on ice before the surgical extraction of  
119 tissues or embryos. The obtained samples were stored on ice until subsequent  
120 manipulations. In this study, we dissected approximately 10 pregnant females and  
121 extracted 15–30 embryos in each operation.

122

123 *RNA-Seq*

124 Total RNA was extracted from trophotaenae of the 3<sup>rd</sup> or 4<sup>th</sup> week of the embryo  
125 extracted from the pregnant female using the RNeasy Plus Mini kit (QIAGEN). A total of  
126 six samples were obtained from three 3<sup>rd</sup> week embryos and three 4<sup>th</sup> week embryos.  
127 Next-generation sequencing (NGS) was outsourced to Macrogen Japan Corp. (Kyoto,  
128 Japan) using NovaSeq6000 (Illumina, Inc., San Diego, CA, USA). Approximately 60  
129 million 150-bp paired-end reads were obtained in each sample. The NGS data was  
130 deposited to the DNA Data Bank of Japan (DDBJ, ID: DRA011209). *De novo* assembly  
131 and mapping to the reference sequence were performed by CLC Genomics Workbench  
132 (Filgen, Inc., Nagoya, Japan). The published transcript sequences of *Poecilia reticulata*  
133 (NCBI Genome, ID: 23338) was used as a reference. The transcript sequences of *X.*  
134 *eiseni* were deposited into the DDBJ. The accession numbers were listed in Table 1.

135

136 *Reverse transcription (RT) PCR*

137 Total RNA was extracted from tissues or whole embryos using the RNeasy Plus Mini kit  
138 and reverse-transcribed using SuperScript IV reverse transcriptase (Thermo Fisher  
139 Scientific). PCR was carried out using KOD-FX-Neo (Toyobo, Osaka, Japan) under the  
140 following conditions: 100 s at 94 °C, followed by 32 cycles of 20 s at 94 °C, 20 s at  
141 60 °C, 60 s at 72 °C, and 120 s at 72 °C. Primer sequences are listed in the Resource  
142 List in Table 1.

143

144 *Antibodies and antiserums*

145 Antiserums against Cubn and Amn were generated in this study. The antigen  
146 sequences were 6× His-tagged peptide of 151 amino acids (aas) corresponding to the  
147 intermediate region of *X. eiseni* Cubn (Accession#, LC595284; aa 691–841) and 6× His-  
148 tagged peptide of 247 aas corresponding to the C-terminal of *X. eiseni* Amn  
149 (Accession#, LC595285). The experimental procedure has been described in our  
150 previous study [15]. All antibodies and antiserums used in this study are listed in Table  
151 S1.

152

### 153 *Immunohistochemistry*

154 Tissue samples were fixed in 4.0% paraformaldehyde/phosphate-buffered saline  
155 (PFA/PBS) at 4 °C overnight. Samples were permeabilized using 0.5% TritonX-100/PBS  
156 at room temperature for 30 min. Endogenous peroxidase was inactivated by 3.0 %  
157 hydrogen peroxide/PBS for 10 min. Then, the sample was treated with Blocking-One  
158 solution (Nacalai Tesque, Kyoto, Japan) at room temperature for 1 h. Primary antibody  
159 or antiserums were used at 1:500 dilution with Blocking-One solution. Samples were  
160 incubated with primary antibody or antiserum at 4 °C overnight. Secondary antibodies  
161 were used at a 1:500 dilution in 0.1% Tween-20/PBS. Samples were treated with the  
162 secondary antibody solution at 4 °C for 2 h. We performed a 3,3'-Diaminobenzidine  
163 Tetrahydrochloride (DAB) color development using the DAB Peroxidase Substrate Kit,  
164 ImmPACT (Vector Laboratories, Inc., Burlingame, CA, USA). Microscopic observation  
165 was performed using an Olympus BX53 microscope and photographed using a DP25  
166 digital camera (Olympus, Shinjuku, Japan).

167



168 *Fluorescent Immunohistochemistry*

169 Tissue samples were fixed in 4.0% PFA/PBS at 4 °C overnight. Samples were  
170 permeabilized using 0.5% TritonX-100/PBS at room temperature for 30 min.  
171 Endogenous peroxidase was inactivated by 3.0 % hydrogen peroxide/PBS for 10 min.  
172 Then, the sample was treated with Blocking-One solution (Nacalai Tesque, Kyoto,  
173 Japan) at room temperature for 1 h. Primary antibody (anti-Cubn) was used at a 1:500  
174 dilution with Blocking-One solution. Samples were incubated with primary antibody at  
175 4 °C overnight. Secondary antibody was used at a 1:500 dilution in 0.1% Tween-20/PBS  
176 with 4',6-diamidino-2-phenylindole (DAPI). Samples were treated with the secondary  
177 antibody solution at 4 °C overnight. Microscopic observation was performed using a  
178 Leica TCS SP8 microscope (Leica Microsystems, Wetzlar, Germany).

179

180 *Immunoelectron microscopy*

181 Embryo samples were fixed in 4.0% PFA/PBS. Fixed samples were washed in PBS,  
182 then reacted with a primary antibody (anti-Cubn) at 4 °C overnight, and then reacted  
183 with biotinylated anti-rabbit IgG (Vector, Burlingame, CA, USA) at room temperature for  
184 2 h. Samples were performed with the avidin–biotin–peroxidase complex kit (Vector),  
185 and visualized with 0.05% DAB (Dojindo Laboratories, Kumamoto, Japan) and 0.01%  
186 hydrogen peroxide in 50 mM Tris buffer (pH 7.2) at room temperature for 10 min. The  
187 procedure for electron microscopy is described in our previous study [15].

188

189 *Labeling acidic organelles*

190 The live embryos immediately after extraction from the pregnant female at the 4<sup>th</sup>-week  
191 post-mating were incubated in PBS with a 1:1000 dilution of LysoTracker® Red (Thermo  
192 Fisher Scientific) for 1 h at room temperature. The samples were fixed with 4.0 %  
193 PFA/PBS and stained with DAPI. Microscopic observation was performed using a Leica  
194 DM5000 B microscope (Leica Microsystems, Wetzlar, Germany).

195

#### 196 *Measurement of Cathepsin L activity*

197 The trophotaenia lysate was prepared from six littermate embryos obtained from the  
198 pregnant females at the 4<sup>th</sup>-week post-mating. The trophotaeniae were manually  
199 extracted from the embryo under a microscope. Proteolysis detection was performed  
200 using the Cathepsin L Activity Fluorometric Assay Kit (BioVision, Inc., Milpitas, CA,  
201 USA). The fluorescence intensities were measured using a Qubit 4 Fluorometer  
202 (Thermo Fisher Scientific).

203

## 204 **Results**

### 205 *Gene expression in trophotaenia*

206 Our previous findings and the hypothesis based on that are described in Figure 1A. In  
207 a viviparous teleost, *X. eiseni*, the embryo is raised in the ovary while receiving maternal  
208 nutrients. The trophotaenia is a pseudoplacenta that plays a role in the absorption of  
209 maternal nutrients consisting of proteins and other supplements. Based on previous  
210 studies, we hypothesized that several maternal proteins are absorbed by endocytosis-  
211 mediated proteolysis in the epithelial cells of the trophotaenia. To verify this hypothesis,  
212 we explored candidate genes for receptor, adaptor, vesicle, and protease proteins that  
213 are highly expressed in the trophotaenia. RNA-Seq analyses were performed using total  
214 RNA extracted from the trophotaeniae of the 3rd- or 4th-week embryos (Figure 1B). We  
215 selected candidate genes and compared their predicted expression level as transcription  
216 per million (TPM) values that were calculated using the known transcript sequence of *P.*  
217 *reticulata* as reference. RNA-Seq suggested that *cubilin* (*cubn*) and *amionless* (*amn*)  
218 were highly expressed in the trophotaeniae; however, other co-receptor genes (*lrp1aa*,  
219 *lrp2a*) were considerably lower (Figure 1C, Table 2). Adaptor protein-2 (AP2) subunit  
220 genes (*ap2a1*, *ap2b1*, *ap2m1a*, and *ap2s1*) were more highly expressed than the other  
221 family adaptor genes (*ldlrp1b* and *numb*) (Figure 1C, Table 2). Two families of the  
222 vesicle coating protein genes (*clta*, *cltbb*, *cltc*; *flot1b*, *flot2a*) were expressed higher than  
223 the vesicle proteins classified in other families (*cav2* and *cav3*) (Figure 1C, Table 2). The  
224 lysosomal endopeptidase enzyme gene (*ctsl.1*) exhibited a high TPM value (> 10,000)  
225 rather than that of not only protease family genes but also most of the genes expressed  
226 in the trophotaeniae (Figure 1C, Table 2). The trend of the predicted TPM values in each  
227 gene was not noticeably different between the 3<sup>rd</sup>- and 4<sup>th</sup>- week samples.

228

### 229 *Sequences for Cubam receptor genes*

230 A Cubam receptor is known to be a membrane-bound multi-ligand receptor consisting  
231 of Cubn and Amn (Figure 2A). The secreted protein Cubn specifically binds to the  
232 transmembrane protein Amn; thus, the CUB domain that associates with the ligands are  
233 localized on the apical surface of the plasma membrane. We obtained the amino acid  
234 sequences of *X. eiseni* Cubn and Amn by *de novo* assembly of NGS reads from the  
235 trophotaeniae. The sequences for Cubn and Amn were compared between four  
236 vertebrate species, *Homo sapiens*, *Danio rerio*, *P. reticulata*, and *X. eiseni*. The binding  
237 motifs were conserved in the species (Figure 2B and C). The intracellular domain of  
238 Amn included two conserved motifs to bind the adaptor proteins, including AP2. The  
239 motifs were also conserved in the species (Figure 2D).

240

### 241 *Distribution of Cubilin and Amnionnless in trophotaenia*

242 To validate the expression of *cubn* and *amn* in the trophotaenia, semi-quantitative RT-  
243 PCR analyses were performed using total RNAs extracted from the whole-embryo  
244 including the trophotaeniae, isolated trophotaeniae, and adult skeletal muscle. The  
245 muscle sample was used as a control for tissue with low endocytosis activity. The gene  
246 expression patterns did not conflict between the results of RT-PCR and RNA-Seq. In the  
247 embryo and trophotaenia, both *cubn* and *amn* were more highly expressed than *Irp2a*  
248 (Figure 3A). Conversely, no or few expressions of the target genes except *actb* as a  
249 positive control were detected in the adult muscle. Next, to detect protein localization,  
250 immunohistochemistry was performed using antibodies against Cubn or Amn. In both

251 proteins, strong signals were observed in the epithelial monolayer of the trophotaenia,  
252 while few background noises were detected in the control assay (Figure 3B-D, see also  
253 Figure S1 and S2). Confocal microscopy revealed the cellular distribution of the anti-  
254 Cubn signals. The signals in the apical surface of the epithelial cell were detected as a  
255 homogeneous distribution, while almost all signals in the cytoplasm were captured as a  
256 dot pattern (Figure 3E, Figure S3). Immunoelectron microscopy revealed that the  
257 microvilli were distributed on the apical surface of the trophotaenia epithelium, and  
258 intracellular vesicles were observed in the cytoplasm; furthermore, anti-Cubn signals  
259 were distributed in the intracellular vesicles and overlapped with the microvilli on the  
260 apical surface (Figure 3F).

261

#### 262 *Proteolysis activity in trophotaenia*

263 Cathepsin L is a lysosomal cysteine proteinase characterized by three conserved  
264 protease regions and active sites consisting of cysteine, histidine, or asparagine (Figure  
265 4A). The functional regions were conserved in the *X. eiseni* Cathepsin L protein  
266 translated from the coding sequence of *ctsl.1*. RT-PCR analysis revealed a strong  
267 expression of *ctsl.1* in the trophotaenia (Figure 4B). To identify which type of cells  
268 include proteolysis activity in the trophotaenia, acidic organelles including lysosomes  
269 and endosomes were detected using a fluorescent probe. The LysoTracker® indicated  
270 the presence of acidic organelles in the epithelial layer cells (Figure 4C). The signals  
271 were distributed in the cytoplasm and were not components in the nuclei (Figure 4D).  
272 According to the RNA-Seq analysis, *ctsl.1* was presumed to be the highest expressed  
273 *cathepsin* gene in the trophotaenia; thus, we calibrated the proteolysis activity of  
274 cathepsin L in the trophotaenia using a fluorescent substrate-based measurement

275 system. The fluorescence indicating substrate digestion was significantly higher in the  
276 trophotaenia lysate than in the control at one h after the reagent mixture. Furthermore,  
277 the intensity of the lysate condition continued to increase for 7 h (Figure 4E, Table 3).  
278 Conversely, the increase in intensity was strongly suppressed by a cathepsin L inhibitor.

279

### 280 *Adaptors and vesicle coating proteins*

281 The expression of candidate genes for adaptors (*ap2a1*, *ap2b1*, *ap2m1a*, *ap2s1*,  
282 *ldlrp1b*, and *numb*) and vesicle coating proteins (*clta* and *cltc*) were confirmed by RT-  
283 PCR (Figure 5). We determined an incomplete transcript for *X. eiseni* Dab2 from the *de*  
284 *novo* assembly; however, it lacked internal sequences in comparison with the proteins in  
285 other vertebrates (Figure S4). Furthermore, no amplicons were obtained by RT-PCR  
286 using primers designed based on the Dab2-like sequence.

287

## 288 **Discussion**

289 RNA-Seq analyses revealed high expression of the genes for receptor-mediated  
290 endocytosis in the trophotaenia of *X. eiseni* embryos. Cubn and Amn form a Cubam  
291 receptor complex that associates with Vitamin-B12, albumin, transferrin, and other  
292 ligands [20,21]. The predicted amino acid sequences for *X. eiseni* Cubn and Amn  
293 obtained from the *de novo* assembly both possessed a conserved motif which allowed  
294 binding to each other, and Amn retained adaptor binding sites in the intracellular region  
295 [21, 22]. Immunohistochemical analysis indicated the presence of Cubn not only in the  
296 apical surface of the epithelial layer but also in the intracellular vesicles in the cells,  
297 suggesting the incorporation and recycling of endocytic receptors [23,24]. This evidence  
298 supports the idea that Cubam plays a role as a receptor for the intraovarian nutrients  
299 and is involved in endocytosis. We also indicated the low presence of Lrp2 (also known  
300 Megalin), which is a major co-receptor for Cubam [25]. This indicated that Cubam works  
301 independently or in cooperation with other co-receptors, except Lrp2, in the  
302 trophotaenia. In zebrafish, a previous study reported that Cubam-dependent  
303 endocytosis in the lysosome rich enterocytes (LREs) does not require the presence of  
304 Lrp2 [19]. This supports our hypothesis; however, we do not exclude the possibility that  
305 our sequencing and alignment processes could not catch other *lrp2* orthologous genes  
306 in *X. eiseni*. Park et al. [19] also reported that Dab2 is an essential adaptor molecule not  
307 only in the zebrafish larval intestine but also in the endocytic nutrient absorption in the  
308 ileum of suckling mice. However, we obtained only an incomplete sequence for the *X.*  
309 *eiseni* Dab2-like protein without an internal region compared with mammalian orthologs.  
310 This may be an alternative splice form with less endocytic activity [26,27]. Furthermore,  
311 we did not detect Dab2-like expression by RT-PCR, and we could not exclude the  
312 possibility that the predicted Dab2-like sequence is caused by an assembly error. Thus,

313 the contribution of Dab2 to endocytosis in the trophotaenia has not been confirmed in  
314 this study. The other adaptor or vesicle coating proteins we detected were typical co-  
315 factors for receptor-mediated endocytosis. Conversely, Caveolin is a vesicle coating  
316 protein involved in receptor-independent endocytosis [28]. Thus, a low expression of  
317 *caveolin* genes (*cav2* and *cav3*) does not conflict with the activation of Cubam-mediated  
318 endocytosis. Additionally, biochemical assays supported that cathepsin L is an active  
319 protease that functions in the intracellular vesicles that is configured following  
320 membrane budding. This evidence supports the idea that Cubam-mediated endocytosis  
321 and cathepsin L-dependent proteolysis is one of the key mechanisms for the absorption  
322 of the maternal component in *X. eiseni* embryos.

323 Cubam is also known to be a scavenger receptor involved in nonspecific protein uptake  
324 [20]. In this study, we did not determine the Cubam ligands in the trophotaenia.  
325 However, the candidates are limited to intraovarian secreted proteins. In several  
326 goodeid species, previous studies indicated that the ovarian fluids include various  
327 proteins in a pattern similar to that in the blood serum [13,29]. Therefore, several serum  
328 proteins, albumen, transferrin, and others known as Cubam ligands, are potential targets  
329 in the case of intraovarian nutrient absorption via the trophotaenia. Another possibility is  
330 that vitellogenin is also a potential target because it is secreted into the ovarian fluids  
331 and is absorbed into the trophotaenia via intracellular vesicles [15]. Another study  
332 suggested that the Cubn-Amn-Lrp2 receptor complex is related to transport of yolk  
333 proteins, including vitellogenin, in endodermal epithelial cells during chicken yolk sac  
334 growth [30]. These reports support the idea that Cubn and Amn are potent candidate  
335 molecules for a receptor complex involved in maternal component uptake in the  
336 trophotaenia. However, functional analyses such as gene knockout or transgenic  
337 technologies used in conventional model animals, such as laboratory mice or small



338 oviparous fish, have not been applied to goodeid fish. For a direct validation of our  
339 hypothesis, these reverse genetic methods should also be developed in the viviparous  
340 teleost.

341 As described above, endocytosis-mediated nutrient absorption is not limited to the  
342 pseudoplacenta of the viviparous fish; it has also been reported in intestinal tissues  
343 (Figure 6). In mammals, macromolecule absorption in the intestine is limited to the  
344 suckling period [31]. In the stomachless fish, endocytosis-mediated absorption is  
345 considered to continue in part of the intestine for life, because of low digestive activity in  
346 the enteric cavity [18]. We found that *Cubn* and *Amn* are also distributed in the intestinal  
347 epithelial cells of adult *X. eiseni*. (Figure S5). In most invertebrate species, because the  
348 extracellular digestive system is primitive, food particles are absorbed into the intestinal  
349 cells by vesicle trafficking and degraded by intracellular digestion [32, 33]. Thus, we  
350 hypothesize that endocytic nutrient absorption and intracellular digestion are ancestral  
351 traits common not only in vertebrates but also in invertebrates, and their importance has  
352 decreased in certain vertebrates with development of the extracellular digestive system  
353 in the enteric cavity. The ancestor of the goodeid species may have applied the  
354 endocytic process to the reproductive system, and then configured the unique hind-gut  
355 derived pseudoplacenta for matrotrophic nutrition during gestation [7,34]. To validate our  
356 hypothesis, further exhaustive omics analyses using the goodeid species and  
357 comparative research using the subfamily Empetrichthyinae, which is the oviparous  
358 species most closely related to the viviparous goodeid fish, are required [6,35].

359 This study is an investigation of species-specific traits based on the transcriptome of a  
360 non-conventional model species. The results revealed potential candidate molecules for  
361 nutrient absorption in the pseudoplacenta of the viviparous teleost. As August Krogh  
362 wrote, this kind of study would be suitable for investigation using the most appropriate

363 species and is unsuitable for verification using alternative models such as viviparous  
364 rodents or oviparous teleosts. We believe that this study is an important and  
365 fundamental step in understanding the strategic variation of the reproductive system in  
366 vertebrates.  
367

368 **Acknowledgments**

369 This work was supported by research grants from the Nakatsuji Foresight Foundation  
370 and the Daiko Foundation.

371

372 **Competing interest statement**

373 The authors declare that they have no competing interests.

374

375 **Data accessibility**

376 The data that support the findings have been provided with the manuscript.

377

378 **References**

- 379 1. A. Krogh, The progress of physiology. *Am. J. Physiol.* **90**, 243-251 (1929).
- 380
- 381 2. D. Blackburn, “Viviparity and oviparity: Evolution and reproductive strategies” in:
- 382 Encyclopedia of Reproduction, Vol. 4, E. Knobil, J. D. Neill, Eds. (Academic
- 383 Press, 1999), pp. 994-1003.
- 384
- 385 3. G. J. Burton, A. L. Fowden, Review: The placenta and developmental
- 386 programming: balancing fetal nutrient demands with maternal resource allocation.
- 387 *Placenta.* **33**, S23-S27 (2012).
- 388
- 389 4. R. W. Gill, G. Kossoff, P. S. Warren, W. J. Garrett, Umbilical venous flow in
- 390 normal and complicated pregnancy. *Ultrasound Med. Biol.* **10**, 349-363 (1984).
- 391
- 392 5. R. M. Roberts, J. A. Green, L. C. Schulz, The evolution of the placenta.
- 393 *Reproduction* (Cambridge, England), **152**, R179–R189 (2016).
- 394
- 395 6. K. L. Foster, K. R. Piller, Disentangling the drivers of diversification in an imperiled
- 396 group of freshwater fishes (Cyprinodontiformes: Goodeidae). *BMC Evol. Biol.* **18**,
- 397 116 (2018).
- 398
- 399 7. C. L. Turner, Pericardial sac, trophotaeniae, and alimentary tract in embryos of
- 400 goodeid fishes. *J. Morphol.* **67**, 271-289 (1940).
- 401
- 402 8. S. M. Tinguely, A. Lange, C. R. Tyler, Ontogeny and Dynamics of the Gonadal
- 403 Development, Embryogenesis, and Gestation in *Xenotoca eiseni*

- 404 (Cyprinodontiformes, Goodeidae). *Sex Dev.* **13**, 297-310 (2019).
- 405
- 406 9. C. L. Turner, Viviparity Superimposed upon Ovo-Viviparity in the Goodeidae, a  
407 Family of Cyprinodont Teleost Fishes of the Mexican Plateau. *J. Morphol.* **55**,  
408 207- 251 (1933).
- 409
- 410 10. C. L. Turner, The trophotaeniae of the goodeidae, a family of viviparous  
411 cyprinodont fishes. *J. Morphol.* **61**, 495- 523 (1937).
- 412
- 413 11. J. Lombardi, J. P. Wourms, The trophotaenial placenta of a viviparous goodeid  
414 fish. I. Ultrastructure of the internal ovarian epithelium, the maternal component.  
415 *J. Morphol.* **184**, 277-292 (1985).
- 416
- 417 12. F. Hollenberg, J. P. Wourms, Ultrastructure and protein uptake of the embryonic  
418 trophotaeniae of four species of goodeid fishes (Teleostei: Atheriniformes). *J.*  
419 *Morphol.* **219**, 105-129 (1994).
- 420
- 421 13. F. Hollenberg, J. P. Wourms, Embryonic growth and maternal nutrient sources in  
422 goodeid fishes (Teleostei: Cyprinodontiformes). *J. Exp. Zool.* **271**, 379–394  
423 (1995).
- 424
- 425 14. A. Vega-López, E. Ortiz-Ordóñez, E. Uría-Galicia, E. L. Mendoza-Santana, R.  
426 Hernández-Cornejo, *et al.*, The role of vitellogenin during gestation of  
427 *Girardinichthys viviparus* and *Ameioba splendens*; two goodeid fish with  
428 matrotrophic viviparity. *Comp. Biochem. Physiol. Part A Mol. Integr. Physiol.* **147**,  
429 731–742 (2007).

- 430
- 431 15. A. Iida, H. N. Arai, Y. Someya, M. Inokuchi, T. A. Onuma, *et al.*, Mother-to-embryo
- 432 vitellogenin transport in a viviparous teleost *Xenotoca eiseni*. *PNAS*, **116**, 22359-
- 433 22365 (2019).
- 434
- 435 16. J. P. Kraehenbuhl, C. Bron, C., B. Sordat, Transfer of humoral secretory and cellular
- 436 immunity from mother to offspring. *Curr. Top. Pathol.* **66**, 105–157 (1979).
- 437
- 438 17. P. C. Moxey, J. S. Trier, Development of villus absorptive cells in the human fetal
- 439 small intestine: a morphological and morphometric study. *Anat. Rec.* **195**, 463–
- 440 482 (1979).
- 441
- 442 18. J. H. Rombout, C. H. Lamers, M. H. Helfrich, A. Dekker, J. J. Taverne-Thiele,
- 443 Uptake and transport of intact macromolecules in the intestinal epithelium of carp
- 444 (*Cyprinus carpio L.*) and the possible immunological implications. *Cell Tissue*
- 445 *Res.* **239**, 519-530 (1985).
- 446
- 447 19. J. Park, D. S. Levic, K. D. Sumigray, J. Bagwell, O. Eroglu, *et al.*, Lysosome-Rich
- 448 Enterocytes Mediate Protein Absorption in the Vertebrate Gut. *Dev. Cell.* **51**, 7-20
- 449 (2019).
- 450
- 451 20. P. J. Verroust, H. Birn, R. Nielsen, R. Kozyraki, E. I. Christensen, The tandem
- 452 endocytic receptors megalin and cubilin are important proteins in renal pathology.
- 453 *Kidney Int.* **62**, 745-756 (2002).
- 454
- 455 21. G. A. Pedersen, S. Chakraborty, A. L. Steinhauser, L. M. Traub, M. Madsen, AMN

- 456           directs endocytosis of the intrinsic factor-vitamin B(12) receptor cubam by  
457           engaging ARH or Dab2. *Traffic*. **11**, 706-720 (2010).
- 458
- 459           22. C. Larsen, A. Etzerodt, M. Madsen, K. Skjødt, S. K. Moestrup, C. B. F. Andersen,  
460           Structural assembly of the megadalton-sized receptor for intestinal vitamin B12  
461           uptake and kidney protein reabsorption. *Nat. Commun.* **9**, 5204 (2018).
- 462
- 463           23. E. I. Christensen, H. Birn, P. Verroust, S. K. Moestrup, Membrane receptors for  
464           endocytosis in the renal proximal tubule. *Int. Rev. Cytol.* **180**, 237-284 (1998).
- 465
- 466           24. B. D. Grant, J. G. Donaldson, Pathways and mechanisms of endocytic recycling.  
467           *Nat. Rev. Mol. Cell Biol.* **10**, 597-608 (2009).
- 468
- 469           25. E. I. Christensen, H. Birn, Megalin and cubilin: multifunctional endocytic  
470           receptors. *Nat. Rev. Mol. Cell Biol.* **4**, 256-266 (2002).
- 471
- 472           26. M. E. Maurer, J. A. Cooper, Endocytosis of megalin by visceral endoderm cells  
473           requires the Dab2 adaptor protein. *J. Cell Sci.* **118**, 5345-55 (2005).
- 474
- 475           27. C. V. Finkielstein, D. G. Capelluto, Disabled-2: A modular scaffold protein with  
476           multifaceted functions in signaling. *Bioessays*. **38**, S45-55 (2016).
- 477
- 478           28. T. M. Williams, M. P. Lisanti, The caveolin proteins. *Genome Biol.* **5**, 214 (2004).
- 479
- 480           29. J. F. Schindler, Structure and function of placental exchange surfaces in goodeid  
481           fishes (Teleostei: Atheriniformes). *J. Morphol.* **276**, 991-1003 (2015).

- 482
- 483 30. R. Bauer, J. A. Plieschnig, T. Finkes, B. Riegler, M. Hermann, W. J. Schneider,
- 484 The developing chicken yolk sac acquires nutrient transport competence by an
- 485 orchestrated differentiation process of its endodermal epithelial cells. *J. Biol.*
- 486 *Chem.* **288**, 1088-1098 (2013).
- 487
- 488 31. V. Muncan, J. Heijmans, S. D. Krasinski, N. V. Büller, M. E. Wildenberg, *et al.*,
- 489 Blimp1 regulates the transition of neonatal to adult intestinal epithelium. *Nat.*
- 490 *Commun.* **2**, 452 (2011).
- 491
- 492 32. P. V. Fankboner, Digestive System of Invertebrates. In book: eLS (2001).
- 493
- 494 33. V. Hartenstein, P. Martinez, Phagocytosis in cellular defense and nutrition: a food-
- 495 centered approach to the evolution of macrophages. *Cell Tissue Res.* **377**, 527–
- 496 547 (2019).
- 497
- 498 34. M. C. Uribe, H. J. Grier, S. A. Avila-Zúñiga, A. García-Alarcón, Change of
- 499 lecithotrophic to matrotrophic nutrition during gestation in the viviparous teleost
- 500 *Xenotoca eiseni* (Goodeidae). *J. Morphol.* **279**, 1336-1345 (2018).
- 501
- 502 35. R. Van Der Laan, W. N. Eschmeyer, R. Fricke, Family-group names of Recent
- 503 fishes. *Zootaxa.* **3882**, 1-230 (2014).
- 504
- 505
- 506



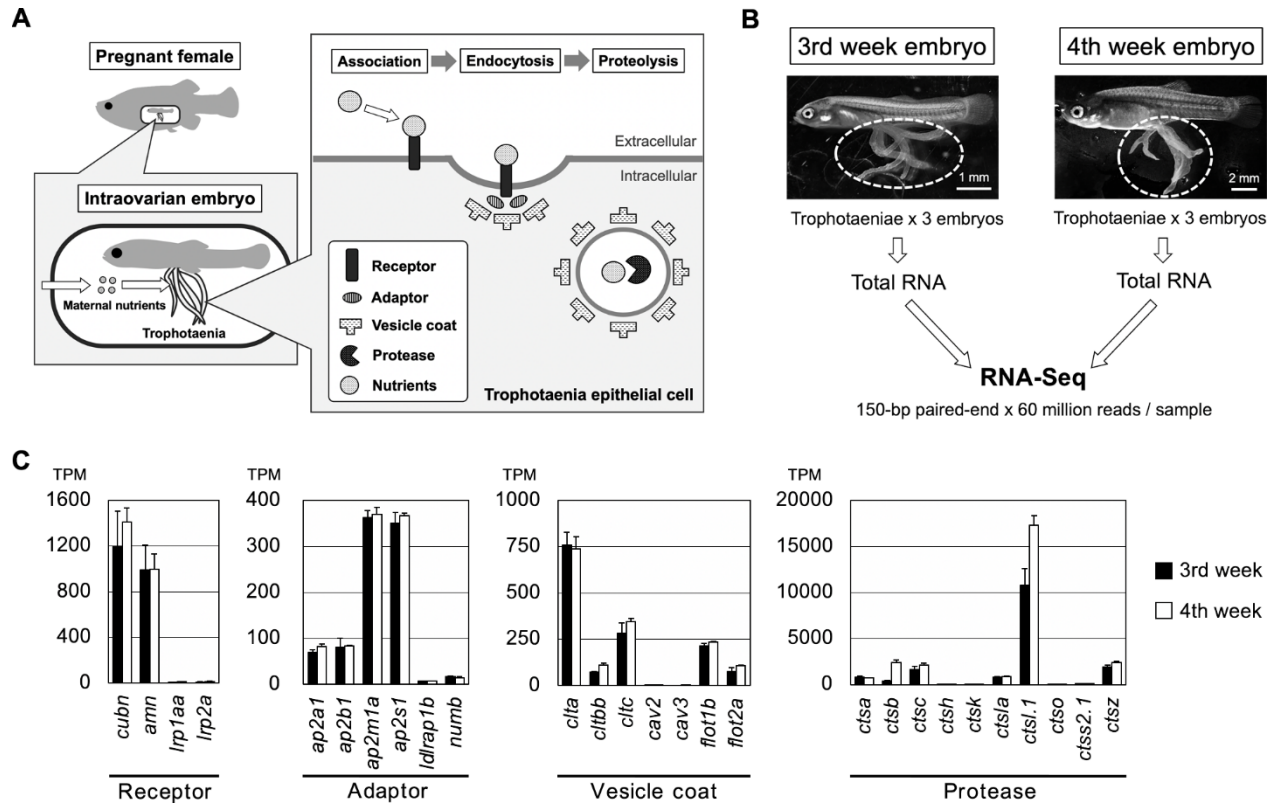

507

## 508 Figure 1. Exploring candidate genes for nutrient absorption

509 **A.** A working model and hypothesis of this study. In the goodeid viviparous fish (*X.*  
 510 *eiseni*), intraovarian embryo absorbs maternal nutrients via the trophotaenia. We  
 511 hypothesized that endocytosis-mediated proteolysis is related to nutrient absorption.  
 512 Based on the scenario, potential target genes are for endocytic receptors, adaptors,  
 513 vesicle coating proteins, and proteases. **B.** An experimental scheme for the RNA-Seq  
 514 analysis. RNA samples were obtained from the trophotaeniae (white dotted line) of the  
 515 single intraovarian embryos extracted from the pregnant females of the 3<sup>rd</sup>- or 4<sup>th</sup>-week  
 516 post-mating. The RNA-Seq was performed using three samples at every stage. **C.** The  
 517 graphs indicate the TPM values of the genes selected from the RNA-Seq data that are  
 518 involved in the endocytosis-mediated proteolysis pathway.

519

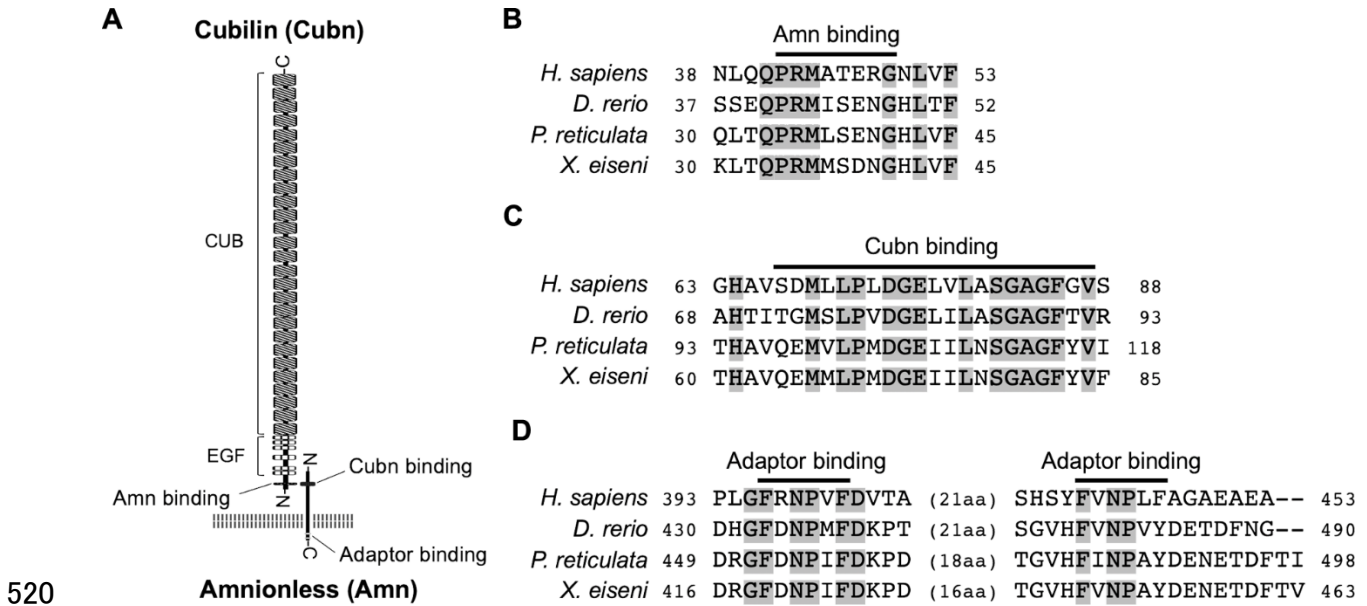

520 **Figure 2. Structures and amino acid sequences for *X. eiseni* Cubn and Amn**

521 **A.** The illustration indicates that a typical structure of Cubam receptor complex consists  
522 of Cubn and Amn. Both proteins possess a conserved motif to bind each other in the N-  
523 terminal regions, and the Amn possesses two adaptor binding motifs in the C-terminal  
524 intracellular domain. **B-D.** A comparison of amino acid sequence around the Amn-  
525 binding motif in Cubn (**B**), Cubn-binding motif in Amn (**C**), and adaptor binding motifs in  
526 Amn (**D**) between *X. eiseni* and three other vertebrate species. The gray filled texts are  
527 conserved sequences among the four species.  
528

529

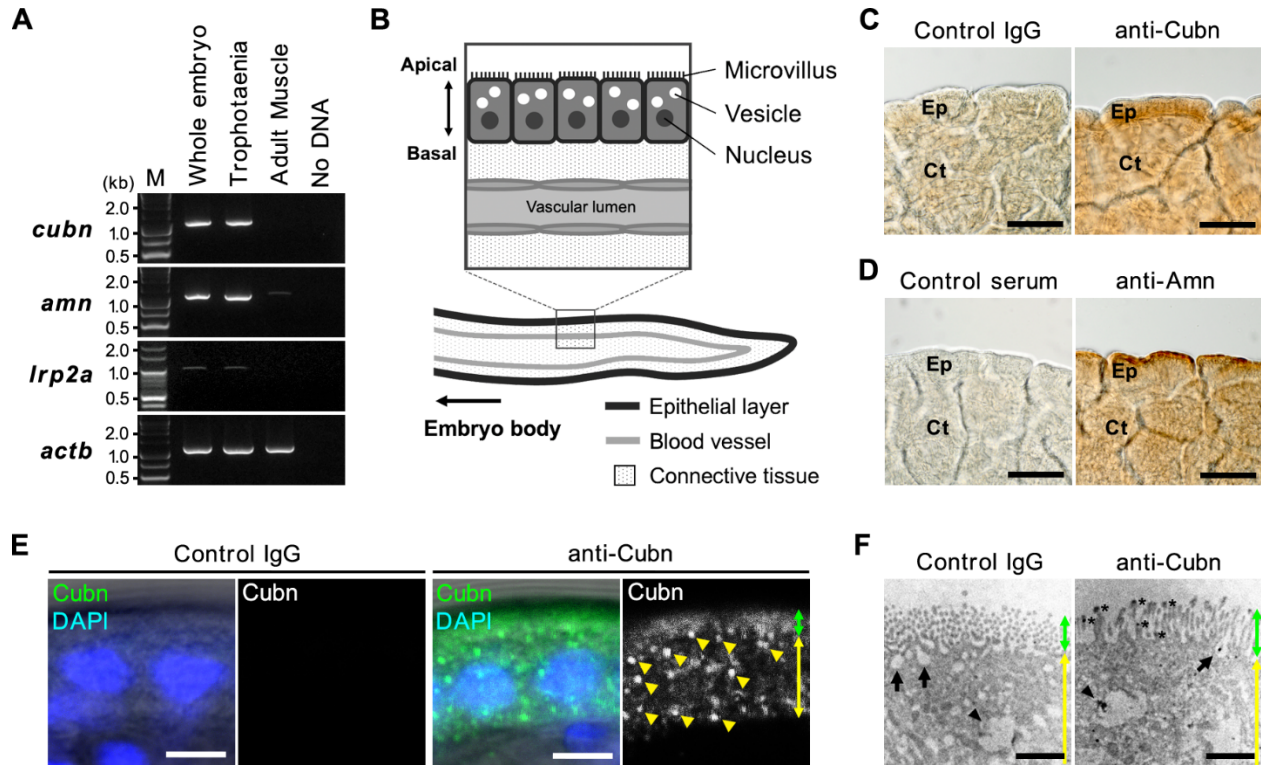

530

531 **Figure 3. Distribution of receptors involved in endocytosis**

532 **A.** RT-PCR for the candidate genes for the receptors involved in the endocytosis. All  
533 amplicons were detected as single band on the expected sizes based on the transcript  
534 sequences obtained from the *de novo* assembly. **B.** The illustration indicates an internal  
535 structure of the trophotaenia. An epithelium cell layer configures an outermost structure  
536 of the trophotaenia, which contacts the ovarian luminal fluids. The layer consists of an  
537 enterocyte-like cell with microvilli on the apical surface and vesicles in the cytoplasm. **C-**  
538 **D.** Immunohistochemistry using the Cubn antibody or Amn antiserum in the  
539 trophotaenia. In both samples, DAB color development was observed in the epithelial  
540 layer. Ep, epithelial layer. Ct, connective tissue. Scale bar, 50  $\mu$ m. **E.** Confocal  
541 microscopy images of fluorescent immunohistochemistry using the Cubn antibody in the  
542 epithelial layer cells. Yellow triangles indicate the dotted signals in the epithelial cells of  
543 the trophotaenia. Green double-headed arrow indicates the apical surface defined by

544 the flat signal. Yellow double-headed arrow indicates the cytoplasmic region including  
545 the dotted signals. Scale bar, 5  $\mu\text{m}$ . **F.** Immunoelectron microscopy using the Cubn  
546 antibody in the epithelial layer cells. Green double-headed arrow indicates the microvilli  
547 on the apical surface. Yellow double-headed arrow indicates the cytoplasmic region  
548 including the dotted signals. Asterisks indicate anti-Cubn signals in the microvilli. Arrows  
549 indicate endocytic vesicles in the invagination phase. Arrowheads indicate intracellular  
550 vesicles after endocytosis. Anti-Cubilin signals were observed in both vesicles. Scale  
551 bar, 1  $\mu\text{m}$ .  
552

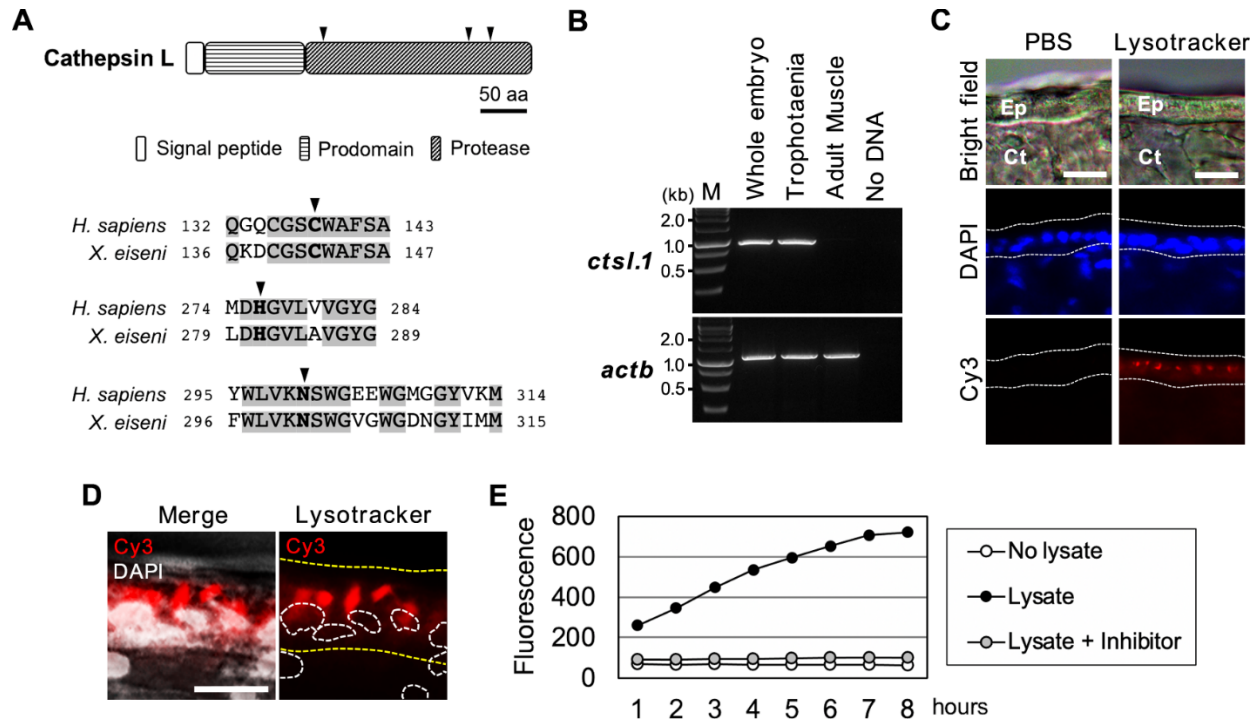

553

554 **Figure 4. Proteolysis activities in trophotaenia**

555 **A.** The illustrations indicate a typical structure of cathepsin L and a comparison of the  
556 protease domains of cathepsin L between *H. sapiens* and *X. eiseni*. The gray filled texts  
557 are conserved sequences among the species. The black triangles indicate protease  
558 active sites. **B.** RT-PCR for *cstl.1* exhibited the highest TPM value in the RNA-Seq  
559 analysis. The amplicons were detected as a single band on the expected size based on  
560 the transcript sequences obtained from the *de novo* assembly. **C.** Labeling of acidic  
561 organelles including lysosomal vesicle in the trophotaenia. The lysotracker treatment  
562 exhibited red fluorescence in the epithelial layer (white dotted line). Ep, epithelial layer.  
563 Ct, connective tissue. Scale bar, 20  $\mu$ m. **D.** High magnification image of the lysotracker-  
564 treated epithelial cell layer of the trophotaenia. Yellow dotted line indicates the epithelial  
565 layer and white dotted circles are the nuclei of the epithelial cells. The lysotracker  
566 fluorescence was observed in the cytoplasm. Scale bar, 10  $\mu$ m. **E.** Measurement of  
567 cathepsin L activity based on fluorescent substrate degradation. The vertical line

568 indicates the accumulation of cleaved fluorescent substrates, which means cathepsin L  
569 activity in the sample solution. The fluorescent value of the trophotaenia lysate sample  
570 was increased by 8 h after the reaction started.  
571

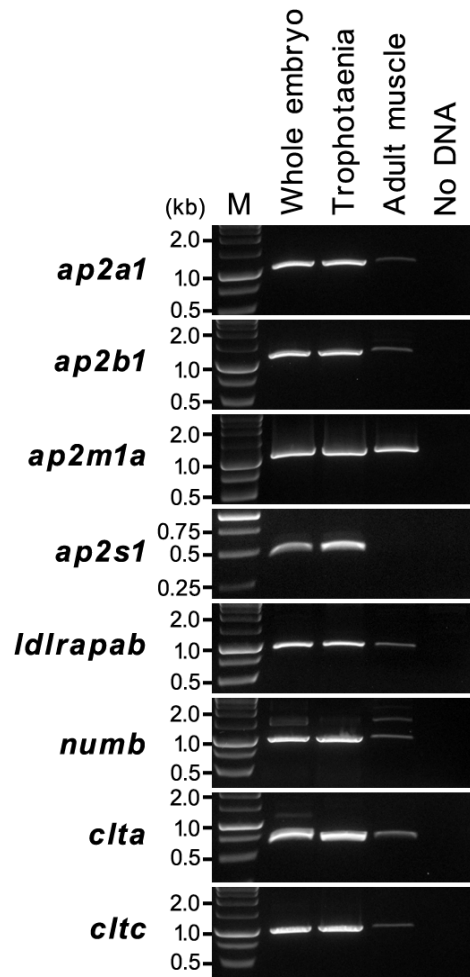

572

573 **Figure 5. Gene expression analysis of the endocytic adaptor and vesicle coating**  
574 **genes.**

575 RT-PCR for the candidate genes for the adaptors and vesicle coating involved in the  
576 endocytosis. The amplicons were detected as single band on the expected sizes based  
577 on the transcript sequences obtained from the *de novo* assembly. M, marker.

578



**Viviparous mammal**  
(*Mus musculus*)

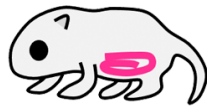

**Stomachless fish**  
(*Danio rerio*)

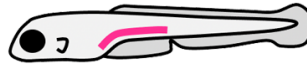

**Viviparous fish**  
(*Xenotoca eiseni*)

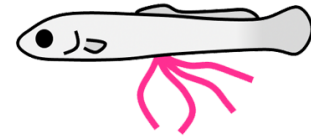

**Stage** Suckling

Larva ~ Adult

Intraovarian embryo

**Tissue** Intestine (Ileum)

Intestine (LREs)

**Trophotaenia**

**Factor** *Dab2*

*cubn, dab2*

*cubn, amn, ctsl.1*

579 **Target** Oral food (Milk)

Oral food (Normal diet)

**Maternal supplement**

580 **Figure 6. Comparison of endocytosis-mediated nutrient intake in vertebrates**

581 Endocytosis-mediated nutrient intake has also been reported in a viviparous mammal  
 582 and stomachless fish. In these species, oral ingestion macromolecules are absorbed  
 583 from a region of the intestine via endocytosis. In contrast, intraovarian embryos of the  
 584 viviparous fish (family Goodeidae) absorbs the maternal component in the ovarian fluids  
 585 from the trophotaeniae via endocytosis. Endocytosis in each species is predicted to be  
 586 driven by similar molecular process in the enterocytes of the intestine or the enterocyte-  
 587 like cells of trophotaenia; however, the biological ontology would be divergent between  
 588 the viviparous fish (intraovarian growth) and the others (feeding after birth).

589

590



| Gene           | Accession # | Primer sequence (5'-3')     | Related figures |
|----------------|-------------|-----------------------------|-----------------|
| <i>cubn</i>    | LC595284    | F ATGGCTGTTACAGTGCAGCCTTCA  | 3A              |
|                |             | R GGCATGTACATACAGGGAATGCTG  |                 |
| <i>amn</i>     | LC595285    | F TGCCCTTTACAAGCAGTGGATTCC  | 3A              |
|                |             | R GCGGATTAGCACAAACCACAATCAC |                 |
| <i>lrp2a</i>   | LC595286    | F ATGTGGAGAACACCGCTGCTTCAA  | 3A              |
|                |             | R CCACATGGAGCAGTCATCGAAATC  |                 |
| <i>ap2a1</i>   | LC595287    | F GCTGTGTCGAAGGGAGATGGAATG  | 5               |
|                |             | R AGAGCTAGATAGCGCAGATTGGTC  |                 |
| <i>ap2b1</i>   | LC595288    | F GTCATTGCTGCCATGACTGTTGGC  | 5               |
|                |             | R CCACAATAGCCTCCTGAACCACAT  |                 |
| <i>ap2m1a</i>  | LC595289    | F GACGTAATGACGGCCTACTTTGGC  | 5               |
|                |             | R CAGCAGCGGGTTTCATAGATGCCA  |                 |
| <i>ap2s1</i>   | LC595290    | F ATGATCCGCTTCATCCTCATCCAG  | 5               |
|                |             | R CTCTAGTGAAGCATGAGGAG      |                 |
| <i>ldlrp1b</i> | LC595291    | F GGACGCTTTAAAATCCGCTGGAAG  | 5               |
|                |             | R GCAGCTGAGTCTGTCTCATCTTGG  |                 |
| <i>numb</i>    | LC595296    | F GAATAAGCTACGGCAGAGCTTCCG  | 5               |
|                |             | R TTGGGCATTGGAGCGGAAGAGAAC  |                 |
| <i>clta</i>    | LC595292    | F GGATGATTTTGACATGCTGAACGC  | 5               |
|                |             | R TAACGGACCAGCGGGGACTGCTTT  |                 |
| <i>cltc</i>    | LC595293    | F CTCAGATCCTGCCAATTCGCTTTC  | 5               |
|                |             | R TCTTCTCCACGCAAACAGACAGC   |                 |
| <i>ctsl.1</i>  | LC595294    | F CAGCATCTCTCTGGAAGATCTCGA  | 4B              |
|                |             | R CAGACTAGTGGATAACTTGCTGCG  |                 |
| <i>actb</i>    | LC595295    | F ATGGAAGATGAAATCGCCGCACTG  | 3A, 4B          |
|                |             | R GAAGCATTTACGGTGGACGATGGA  |                 |

591 **Table 1. List of primers used in the study.**

592 F, forward, R, reverse.

|          |                | 3 weeks |      |       |              | 4 weeks |       |       |              |
|----------|----------------|---------|------|-------|--------------|---------|-------|-------|--------------|
|          |                | #1      | #2   | #3    | Average      | #1      | #2    | #3    | Average      |
| Receptor | <i>cubn</i>    | 1421    | 768  | 1414  | <b>1201</b>  | 1528    | 1464  | 1250  | <b>1414</b>  |
|          | <i>amn</i>     | 745     | 966  | 1269  | <b>993</b>   | 1139    | 818   | 1032  | <b>996</b>   |
|          | <i>lrp1aa</i>  | 6       | 4    | 10    | <b>7</b>     | 14      | 10    | 8     | <b>11</b>    |
|          | <i>lrp2a</i>   | 12      | 6    | 10    | <b>9</b>     | 12      | 7     | 12    | <b>10</b>    |
| Adaptor  | <i>ap2a1</i>   | 75      | 60   | 73    | <b>69</b>    | 78      | 89    | 82    | <b>83</b>    |
|          | <i>ap2b1</i>   | 91      | 54   | 98    | <b>81</b>    | 84      | 83    | 85    | <b>84</b>    |
|          | <i>ap2m1a</i>  | 383     | 346  | 360   | <b>363</b>   | 349     | 374   | 385   | <b>369</b>   |
|          | <i>ap2s1</i>   | 365     | 318  | 368   | <b>350</b>   | 359     | 370   | 371   | <b>367</b>   |
| Vesicle  | <i>ldlrab</i>  | 7       | 6    | 7     | <b>7</b>     | 8       | 8     | 6     | <b>7</b>     |
|          | <i>numb</i>    | 19      | 15   | 19    | <b>18</b>    | 17      | 15    | 13    | <b>15</b>    |
|          | <i>clta</i>    | 851     | 680  | 744   | <b>758</b>   | 664     | 739   | 817   | <b>740</b>   |
|          | <i>cltb</i>    | 67      | 76   | 73    | <b>72</b>    | 97      | 127   | 104   | <b>109</b>   |
|          | <i>cltc</i>    | 337     | 209  | 308   | <b>285</b>   | 328     | 366   | 343   | <b>346</b>   |
|          | <i>cav2</i>    | 1       | 0    | 2     | <b>1</b>     | 4       | 2     | 3     | <b>3</b>     |
|          | <i>cav3</i>    | 0       | 0    | 0     | <b>0</b>     | 0       | 0     | 0     | <b>0</b>     |
|          | <i>flot1b</i>  | 229     | 196  | 221   | <b>215</b>   | 228     | 238   | 234   | <b>233</b>   |
|          | <i>flot2a</i>  | 91      | 50   | 89    | <b>77</b>    | 228     | 238   | 234   | <b>233</b>   |
| Protease | <i>ctsa</i>    | 862     | 691  | 939   | <b>831</b>   | 751     | 749   | 720   | <b>740</b>   |
|          | <i>ctsb</i>    | 474     | 234  | 429   | <b>379</b>   | 2686    | 2559  | 1944  | <b>2396</b>  |
|          | <i>ctsc</i>    | 1867    | 1113 | 1907  | <b>1629</b>  | 2273    | 2320  | 1884  | <b>2159</b>  |
|          | <i>ctsh</i>    | 52      | 31   | 52    | <b>45</b>    | 47      | 55    | 48    | <b>50</b>    |
|          | <i>ctsk</i>    | 11      | 17   | 14    | <b>14</b>    | 24      | 24    | 18    | <b>22</b>    |
|          | <i>ctsla</i>   | 831     | 736  | 939   | <b>835</b>   | 960     | 809   | 924   | <b>898</b>   |
|          | <i>ctsl.1</i>  | 12749   | 8412 | 11227 | <b>10796</b> | 17795   | 18334 | 15906 | <b>17345</b> |
|          | <i>ctso</i>    | 3       | 5    | 7     | <b>5</b>     | 6       | 7     | 8     | <b>7</b>     |
|          | <i>ctss2.1</i> | 2144    | 1656 | 2042  | <b>1947</b>  | 2494    | 2500  | 2342  | <b>2445</b>  |
|          | <i>ctsz</i>    | 66      | 63   | 63    | <b>64</b>    | 530     | 551   | 523   | <b>535</b>   |

593 **Table 2. The TPM values for endocytic genes in the RNA-seq analysis.**

594

|                           |                | <b>1 h</b>   | <b>2 h</b>   | <b>3 h</b>   | <b>4 h</b>   | <b>5 h</b>   | <b>6 h</b>   | <b>7 h</b>   | <b>8 h</b>   |
|---------------------------|----------------|--------------|--------------|--------------|--------------|--------------|--------------|--------------|--------------|
| <b>No lysate</b>          | #1             | 68.8         | 67.8         | 67.2         | 65.8         | 65.5         | 65.8         | 65.6         | 65.2         |
|                           | #2             | 66.5         | 65.9         | 64.8         | 62.7         | 64.0         | 64.4         | 63.8         | 62.7         |
|                           | #3             | 66.8         | 65.4         | 69.8         | 63.1         | 63.3         | 62.8         | 61.8         | 62.6         |
|                           | <b>Average</b> | <b>67.4</b>  | <b>66.3</b>  | <b>67.3</b>  | <b>63.8</b>  | <b>64.3</b>  | <b>64.3</b>  | <b>63.8</b>  | <b>63.5</b>  |
| <b>Lysate</b>             | #1             | 260.3        | 345.0        | 437.7        | 530.4        | 579.7        | 637.3        | 699.6        | 694.1        |
|                           | #2             | 264.9        | 351.6        | 460.3        | 551.3        | 617.0        | 678.4        | 727.0        | 748.2        |
|                           | #3             | 256.6        | 339.2        | 441.8        | 522.7        | 587.1        | 642.9        | 692.5        | 720.8        |
|                           | <b>Average</b> | <b>260.6</b> | <b>345.3</b> | <b>446.6</b> | <b>534.8</b> | <b>594.6</b> | <b>652.9</b> | <b>706.3</b> | <b>721.0</b> |
| <b>Lysate + inhibitor</b> | #1             | 94.0         | 96.2         | 98.0         | 99.6         | 101.0        | 106.8        | 104.4        | 101.9        |
|                           | #2             | 88.1         | 88.8         | 91.1         | 91.5         | 93.4         | 94.0         | 98.0         | 98.2         |
|                           | #3             | 88.3         | 88.4         | 89.4         | 93.1         | 94.2         | 96.4         | 99.4         | 101.0        |
|                           | <b>Average</b> | <b>90.1</b>  | <b>91.2</b>  | <b>92.8</b>  | <b>94.7</b>  | <b>96.2</b>  | <b>99.0</b>  | <b>100.6</b> | <b>100.4</b> |

595 **Table 3. The measured fluorescent signal values indicating cathepsin L-**  
596 **dependent proteolysis.**
